# Supplementary material for: The Relevance of IL-1-Signaling in the Protection against Gram-Positive Bacteria
Source: PubMed Central journal article supplement (PMC7911888; doi:10.3390/pathogens10020132), 2021-01-28
Supplement: pathogens-10-00132-s001.pdf [file pathogens-10-00132-s001.pdf]

Fig. S1

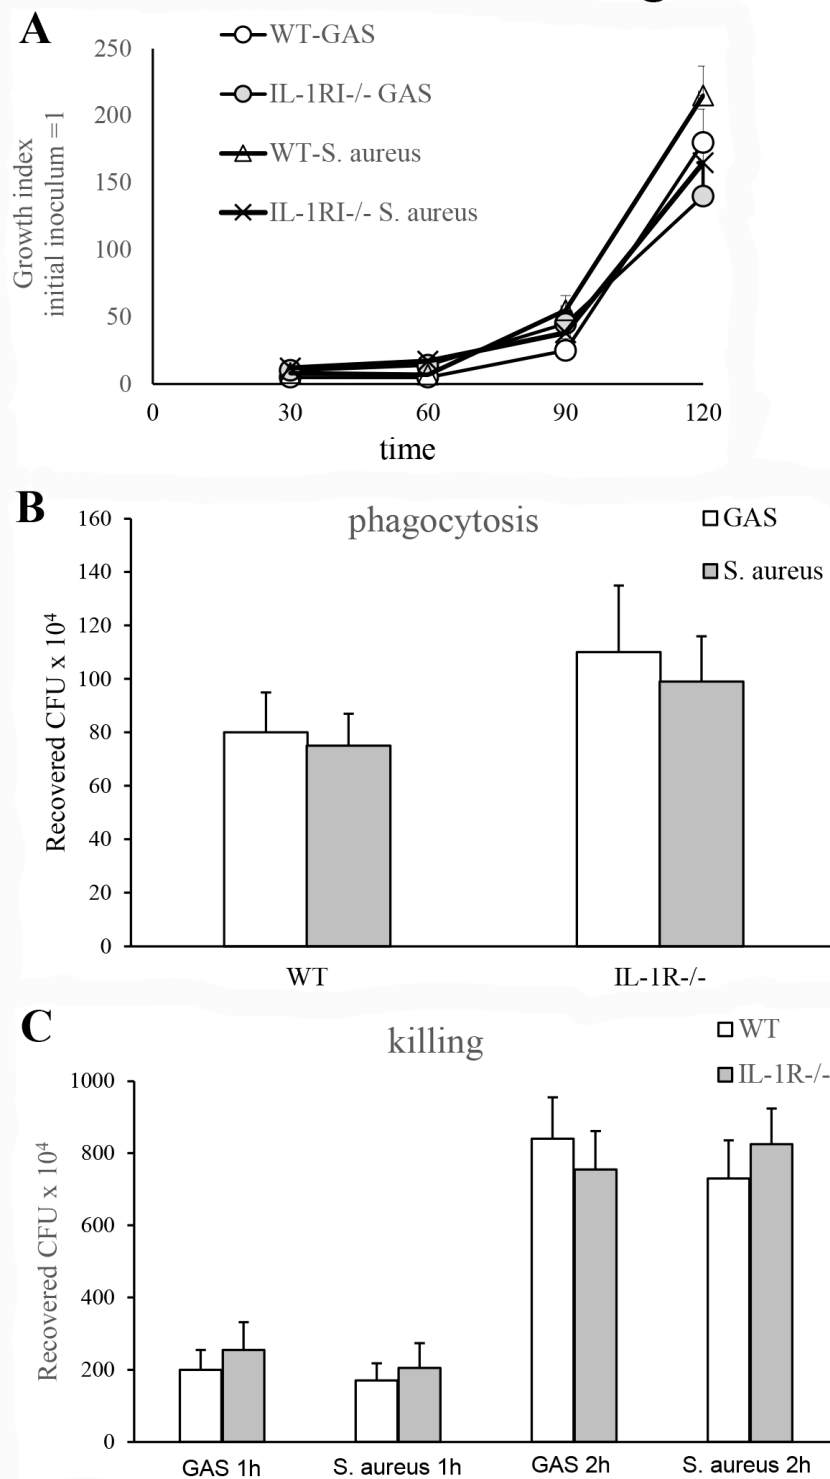

**Figure S1.** IL-1 signaling has no effect on phagocytosis and killing of GAS or *S. aureus*. (A), Whole blood (0.2 ml) from WT or IL-1RI KO mice was infected with  $2 \times 10^4$  GAS or *S. aureus* and bacteria were enumerated at the time points indicated after incubation at 37°C. Phagocytosis (B) and killing (C) of GAS or *S. aureus* by bone marrow derived macrophages from WT and IL-1RI-deficient mice are also shown. Data are expressed as means  $\pm$  standard deviations of triplicate observations, each from a different experiment.
